# Supplementary material
Source: publisher figshare collection journal article supplement (https://tandf.figshare.com/ndownloader/files/15469232)
Supplement: Supplementary file 1 [file 15469232]

**Table S1. Effects of RTF on lifespan of *C.elegans***

| Strains       | Treatments | N  | Mean $\pm$ SD      |
|---------------|------------|----|--------------------|
| N2            | Control    | 90 | 21.14 $\pm$ 0.84 b |
|               | PQ         | 90 | 6.43 $\pm$ 0.42 d  |
|               | RTF        | 90 | 23.23 $\pm$ 0.42 a |
|               | PQ+RTF     | 90 | 8.64 $\pm$ 0.61 c  |
| daf-2 (e1370) | Control    | 90 | 24.18 $\pm$ 3.55 b |
|               | PQ         | 90 | 9.53 $\pm$ 1.37 c  |
|               | RTF        | 90 | 25.35 $\pm$ 2.64 a |
|               | PQ+RTF     | 90 | 9.33 $\pm$ 1.39 c  |
| daf-16 (mu86) | Control    | 90 | 13.91 $\pm$ 1.03 a |
|               | PQ         | 90 | 7.69 $\pm$ 2.24 b  |
|               | RTF        | 90 | 14.94 $\pm$ 4.11 a |
|               | PQ+RTF     | 90 | 7.50 $\pm$ 1.57 b  |

Values with different uppercase letters in same concentration groups are significantly different according to Duncan test ( $p < 0.05$ ), values with different lower case letters in same RTE groups are significantly different according to the Duncan test ( $p < 0.05$ ).
